# Supplementary material for: (−)-Adaline from the Adalia Genus of Ladybirds Is a Potent Antagonist of Insect and Specific Mammalian Nicotinic Acetylcholine Receptors
Source: MDPI journal article supplement (doi:10.3390/molecules27207074), 2022-10-20

# (–)-Adaline from the *Adalia* genus of ladybirds is a potent antagonist of insect and specific mammalian nicotinic acetylcholine receptors

David P. Richards<sup>1</sup>, Rohit N. Patel<sup>1</sup>, Ian R. Duce<sup>1</sup>, Bhupinder P.S. Khambay<sup>2</sup>, Michael A. Birkett<sup>2</sup>, John A. Pickett<sup>2,3</sup> and Ian R. Mellor<sup>1,\*</sup>

<sup>1</sup> School of Life Sciences, University of Nottingham, University Park, Nottingham, NG7 2RD, UK.

<sup>2</sup> Rothamsted Research, West Common, Harpenden Hertfordshire, AL5 2JQ, UK.

<sup>3</sup> School of Chemistry, Cardiff University, Cardiff, CF10 3AT, UK.

\* Correspondence: ian.mellor@nottingham.ac.uk; Tel.: +44 1159 513257

## Contents

|                |   |
|----------------|---|
| Figure S1..... | 2 |
|----------------|---|

**List of abbreviations used:** ACh: acetylcholine; nAChR: nicotinic acetylcholine receptor; DCM: dichloromethane; DMEM: Dulbecco's modified Eagle medium; EGTA: ethylene glycol-bis(β-aminoethyl ether)-*N,N,N',N'*-tetraacetic acid; FCS: foetal calf serum; HEPES: *N*-(2-hydroxyethyl)piperazine-*N'*-(2-ethanesulfonic acid)

**Figure S1.** GC-MS analysis. Main graph: gas chromatogram (Agilent 5890 GC, Agilent Technologies, Santa Clara, California, USA) of the *A. bipunctata* alkaloid fraction showing the major peak of (–)-adaline present in the sample. Insert: coupled 70 eV mass spectrum of (–)-adaline.

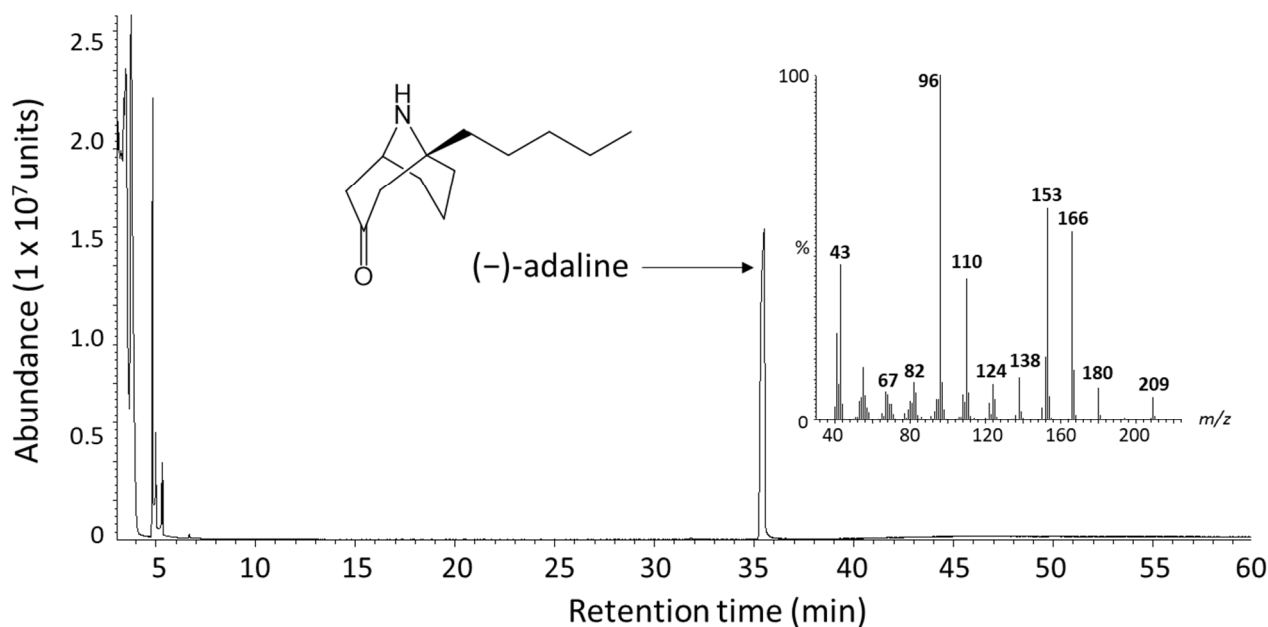

Supplement: s1 [file s1]
